# Supplementary material for: Characteristics of bacterial and fungal communities and their associations with sugar compounds in atmospheric aerosols at a rural site in northern China
Source: Copernicus journal article supplement (doi:10.5194/bg-20-4915-2023), 2023-12-14
Supplement: Supplementary file 1 [file bg-20-4915-2023-supplement.pdf]

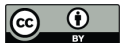

*Supplement of*

## **Characteristics of bacterial and fungal communities and their associations with sugar compounds in atmospheric aerosols at a rural site in northern China**

**Mutong Niu et al.**

*Correspondence to:* Wei Hu ([huwei@tju.edu.cn](mailto:huwei@tju.edu.cn)) and Pingqing Fu ([fupingqing@tju.edu.cn](mailto:fupingqing@tju.edu.cn))

The copyright of individual parts of the supplement might differ from the article licence.

**Table S1.** Reference samples used to trace the source of the airborne microbes obtained from the NCBI SRA repository (<http://www.ncbi.nlm.nih.gov/sra>).

| Accession number | Platform       | Sampling Site | Source |
|------------------|----------------|---------------|--------|
| Bacteria         |                |               |        |
| SRR6429182       | Illumina MiSeq | Bohai Sea     | Ocean  |
| SRR6429183       | Illumina MiSeq | Bohai Sea     | Ocean  |
| SRR6429184       | Illumina MiSeq | Bohai Sea     | Ocean  |
| SRR6429185       | Illumina MiSeq | Bohai Sea     | Ocean  |
| Fungi            |                |               |        |
| SRR5149688       | Illumina MiSeq | Bohai Sea     | Ocean  |
| SRR5149690       | Illumina MiSeq | Bohai Sea     | Ocean  |
| SRR5149691       | Illumina MiSeq | Bohai Sea     | Ocean  |
| SRR5149695       | Illumina MiSeq | Bohai Sea     | Ocean  |
| SRR5149697       | Illumina MiSeq | Bohai Sea     | Ocean  |

**Table S2.**  $\alpha$ -Diversity indices of airborne bacteria and fungi.

| Samples          | Tags         | OTU         | Chao1        | Shannon    | Simpson     |
|------------------|--------------|-------------|--------------|------------|-------------|
| Bacteria         |              |             |              |            |             |
| 0807D            | 27674        | 164         | 201.0        | 5.4        | 0.96        |
| 0807N            | 23442        | 381         | 458.0        | 6.7        | 0.96        |
| 0808D            | 42354        | 223         | 720.0        | 5.4        | 0.95        |
| 0808N            | 30991        | 1018        | 490.3        | 8.5        | 0.99        |
| 0809D            | 40535        | 377         | 602.1        | 5.9        | 0.96        |
| 0809N            | 47006        | 348         | 721.5        | 6.6        | 0.98        |
| 0810D            | 31402        | 235         | 781.6        | 5.7        | 0.94        |
| 0810N            | 27560        | 340         | 540.1        | 5.7        | 0.97        |
| 0811D            | 43710        | 308         | 1078.3       | 4.6        | 0.83        |
| 0811N            | 63049        | 669         | 495.2        | 8.1        | 0.99        |
| 0812D            | 41915        | 412         | 677.3        | 3.4        | 0.85        |
| 0812N            | 42050        | 335         | 756.0        | 6.5        | 0.98        |
| 0813D            | 49260        | 516         | 672.1        | 7.4        | 0.99        |
| 0813N            | 28961        | 336         | 425.5        | 6.0        | 0.95        |
| <b>Daytime</b>   | <b>39550</b> | <b>319</b>  | <b>675.1</b> | <b>5.4</b> | <b>0.93</b> |
| <b>Nighttime</b> | <b>37580</b> | <b>489</b>  | <b>555.2</b> | <b>6.8</b> | <b>0.97</b> |
| Fungi            |              |             |              |            |             |
| 0807D            | 27498        | 103         | 133.0        | 2.7        | 0.70        |
| 0807N            | 60901        | 445         | 332.5        | 4.0        | 0.83        |
| 0808D            | 30219        | 247         | 425.8        | 3.5        | 0.69        |
| 0808N            | 63457        | 465         | 469.1        | 3.9        | 0.8         |
| 0809D            | 114521       | 376         | 412.3        | 2.9        | 0.56        |
| 0809N            | 52159        | 464         | 396.2        | 4.2        | 0.81        |
| 0810D            | 69933        | 375         | 492.1        | 5.2        | 0.93        |
| 0810N            | 70349        | 473         | 568.5        | 4.9        | 0.90        |
| 0811D            | 62021        | 365         | 609.6        | 3.4        | 0.64        |
| 0811N            | 31324        | 558         | 628.8        | 4.1        | 0.74        |
| 0812D            | 50487        | 285         | 565.9        | 4.4        | 0.85        |
| 0812N            | 57687        | 450         | 702.0        | 4.4        | 0.86        |
| 0813D            | 54338        | 403         | 555.6        | 3.7        | 0.79        |
| 0813N            | 51989        | 472         | 619.9        | 4.8        | 0.90        |
| <b>Daytime</b>   | <b>58431</b> | <b>308*</b> | <b>456.3</b> | <b>3.7</b> | <b>0.74</b> |
| <b>Nighttime</b> | <b>55409</b> | <b>475*</b> | <b>531.0</b> | <b>4.3</b> | <b>0.83</b> |

**Table S3.** The taxa at the phylum and genus levels with LDA scores > 2 and their relative abundances in the daytime and nighttime.

| Taxonomic level | Name                     | Day  | Night | LDA (log <sub>10</sub> ) | Dominant group |
|-----------------|--------------------------|------|-------|--------------------------|----------------|
| phylum          | Ascomycota               | 65.3 | 28.6  | 5.3                      | Day            |
| genus           | <i>Curvularia</i>        | 0.64 | 0.11  | 3.4                      | Day            |
| genus           | <i>Plenodomus</i>        | 0.01 | 0.00  | 3.7                      | Day            |
| genus           | <i>Periconia</i>         | 1.86 | 0.26  | 3.9                      | Day            |
| genus           | <i>Cladosporium</i>      | 1.39 | 0.35  | 3.7                      | Day            |
| genus           | <i>Sphaerulina</i>       | 0.53 | 0.11  | 3.3                      | Day            |
| genus           | <i>Aspergillus</i>       | 2.88 | 0.26  | 4.1                      | Day            |
| genus           | <i>Gelasinospora</i>     | 0.19 | 0.02  | 3.0                      | Day            |
| genus           | <i>Holtermanniella</i>   | 0.46 | 0.16  | 3.2                      | Day            |
| phylum          | Basidiomycota            | 13.6 | 34.0  | 5.0                      | Night          |
| genus           | <i>Phaeosphaeria</i>     | 0.07 | 0.16  | 2.8                      | Night          |
| genus           | <i>Dissoconium</i>       | 0.01 | 0.08  | 2.8                      | Night          |
| genus           | <i>Cyphellophora</i>     | 0.00 | 0.04  | 2.9                      | Night          |
| genus           | <i>Phyllopsora</i>       | 0.00 | 0.02  | 3.3                      | Night          |
| genus           | <i>Spathularia</i>       | 0.00 | 0.02  | 3.1                      | Night          |
| genus           | <i>Colletotrichum</i>    | 0.02 | 0.12  | 2.9                      | Night          |
| genus           | <i>Gibellulopsis</i>     | 0.00 | 0.01  | 3.2                      | Night          |
| genus           | <i>Plectosphaerella</i>  | 0.08 | 1.49  | 3.8                      | Night          |
| genus           | <i>Clonostachys</i>      | 0.02 | 0.20  | 3.1                      | Night          |
| genus           | <i>Lecanicillium</i>     | 0.02 | 0.04  | 2.9                      | Night          |
| genus           | <i>Cosmospora</i>        | 0.03 | 0.16  | 2.9                      | Night          |
| genus           | <i>Pseudocosmospora</i>  | 0.00 | 0.01  | 3.2                      | Night          |
| genus           | <i>Alfaria</i>           | 0.01 | 0.07  | 2.7                      | Night          |
| genus           | <i>Phomatospora</i>      | 0.01 | 0.07  | 2.7                      | Night          |
| genus           | <i>Phyllachora</i>       | 0.00 | 0.01  | 3.0                      | Night          |
| genus           | <i>Agaricus</i>          | 0.14 | 1.46  | 3.9                      | Night          |
| genus           | <i>Clitopilus</i>        | 0.01 | 0.11  | 2.8                      | Night          |
| genus           | <i>Crinipellis</i>       | 0.01 | 0.03  | 2.8                      | Night          |
| genus           | <i>Marasmius</i>         | 0.01 | 0.07  | 3.2                      | Night          |
| genus           | <i>Cryptomarasmius</i>   | 0.00 | 0.02  | 2.9                      | Night          |
| genus           | <i>Volvariella</i>       | 0.00 | 0.01  | 3.0                      | Night          |
| genus           | <i>Hohenbuehelia</i>     | 0.00 | 0.02  | 2.9                      | Night          |
| genus           | <i>Pterula</i>           | 0.00 | 0.00  | 3.2                      | Night          |
| genus           | <i>Aphanobasidium</i>    | 0.00 | 0.02  | 3.0                      | Night          |
| genus           | <i>Coprinopsis</i>       | 1.67 | 11.4  | 4.7                      | Night          |
| genus           | <i>Cristinia</i>         | 0.00 | 0.01  | 2.8                      | Night          |
| genus           | <i>Schizophyllum</i>     | 0.01 | 0.03  | 2.9                      | Night          |
| genus           | <i>Clitocybe</i>         | 0.02 | 0.16  | 2.9                      | Night          |
| genus           | <i>Melanoleuca</i>       | 0.00 | 0.02  | 3.0                      | Night          |
| genus           | <i>Coniophora</i>        | 0.00 | 0.01  | 3.5                      | Night          |
| genus           | <i>Ceratobasidium</i>    | 0.00 | 0.02  | 3.3                      | Night          |
| genus           | <i>Limonomyces</i>       | 0.07 | 1.35  | 3.8                      | Night          |
| genus           | <i>Hyphodontia</i>       | 0.00 | 0.03  | 2.7                      | Night          |
| genus           | <i>Hydnophlebia</i>      | 0.04 | 0.21  | 3.0                      | Night          |
| genus           | <i>Hyphoderma</i>        | 0.04 | 0.13  | 2.8                      | Night          |
| genus           | <i>Brunneoporus</i>      | 0.01 | 0.02  | 3.0                      | Night          |
| genus           | <i>Podoscypha</i>        | 0.00 | 0.02  | 3.0                      | Night          |
| genus           | <i>Peniophora</i>        | 0.00 | 0.25  | 3.1                      | Night          |
| genus           | <i>Trechispora</i>       | 0.07 | 0.08  | 2.6                      | Night          |
| genus           | <i>Kondoa</i>            | 0.00 | 0.06  | 2.8                      | Night          |
| genus           | <i>Golubevia</i>         | 0.00 | 0.01  | 2.9                      | Night          |
| genus           | <i>Meira</i>             | 0.00 | 0.02  | 2.9                      | Night          |
| genus           | <i>Rhodospordiobolus</i> | 0.02 | 0.05  | 3.1                      | Night          |
| genus           | <i>Sporobolomyces</i>    | 0.02 | 0.15  | 3.0                      | Night          |
| genus           | <i>Colacogloea</i>       | 0.00 | 0.02  | 3.3                      | Night          |
| genus           | <i>Hannaella</i>         | 0.01 | 0.09  | 2.8                      | Night          |
| genus           | <i>Bulleromyces</i>      | 0.01 | 0.03  | 3.0                      | Night          |

**Table S4.** Concentrations of sugar components in aerosol samples.

| Compounds (ng m <sup>-3</sup> ) | Daytime (N = 7) |      |      |      | Nighttime (N = 7) |      |      |      |
|---------------------------------|-----------------|------|------|------|-------------------|------|------|------|
|                                 | Min             | Max  | Mean | SD   | Min               | Max  | Mean | SD   |
| <b>Anhydrosugars</b>            |                 |      |      |      |                   |      |      |      |
| levoglucosan                    | 10.3            | 30.3 | 18.4 | 7.43 | 2.97              | 55.8 | 30.0 | 20.1 |
| mannosan                        | 0.78            | 1.93 | 1.30 | 0.47 | 0.24              | 4.99 | 2.05 | 1.60 |
| galactosan                      | 0.55            | 0.96 | 0.68 | 0.15 | 0.21              | 3.01 | 1.41 | 0.98 |
| subtotal                        | 11.7            | 33.0 | 20.4 | 7.90 | 3.42              | 63.8 | 33.4 | 22.5 |
| <b>Primary sugars</b>           |                 |      |      |      |                   |      |      |      |
| xylose                          | 0.34            | 1.04 | 0.61 | 0.26 | 0.20              | 1.85 | 0.79 | 0.54 |
| fructose                        | 6.21            | 20.4 | 11.6 | 4.85 | 1.42              | 12.5 | 7.27 | 3.79 |
| glucose                         | 23.8            | 60.8 | 42.4 | 14.7 | 17.7              | 52.0 | 36.6 | 12.8 |
| sucrose                         | 0.59            | 111  | 67.6 | 35.8 | 1.27              | 65.3 | 28.6 | 23.5 |
| trehalose                       | 18.6            | 48.2 | 29.8 | 10.6 | 39.2              | 102  | 67.6 | 23.4 |
| subtotal                        | 100             | 228  | 152  | 49.0 | 78.4              | 190  | 141  | 47.2 |
| <b>Sugar alcohols</b>           |                 |      |      |      |                   |      |      |      |
| arabitol                        | 10.4            | 23.7 | 16.0 | 5.13 | 16.3              | 59.6 | 31.1 | 13.4 |
| mannitol                        | 26.7            | 55.9 | 41.5 | 10.7 | 68.7              | 128  | 101  | 21.9 |
| glycerol                        | 2.73            | 16.2 | 6.90 | 4.39 | 3.86              | 14.3 | 9.79 | 3.60 |
| erythritol                      | 3.65            | 6.47 | 4.76 | 1.11 | 5.65              | 18.1 | 11.9 | 4.37 |
| inositol                        | 1.96            | 10.4 | 4.84 | 2.67 | 1.29              | 5.22 | 3.34 | 1.37 |
| subtotal                        | 53.1            | 97.3 | 74.1 | 19.1 | 110               | 193  | 157  | 33.6 |
| Σsaccharides                    | 186             | 358  | 247  | 67.0 | 196               | 420  | 331  | 84.4 |

**Table S5.** Spearman correlation of sugar components and environmental or fungal  $\alpha$ -diversity indices.

| Factors                       | Anhyrosugars |          |              | Sugar alcohols |          |            |          | Primary saccharides |         |          |          |         |           |
|-------------------------------|--------------|----------|--------------|----------------|----------|------------|----------|---------------------|---------|----------|----------|---------|-----------|
|                               | Galactosan   | Mannosan | Levoglucozan | Arabitol       | Mannitol | Erythritol | Inositol | Glycerol            | Glucose | Sucrose  | Fructose | Xylose  | Trehalose |
| Galactosan                    | 1            |          |              |                |          |            |          |                     |         |          |          |         |           |
| Mannosan                      | 0.833**      | 1        |              |                |          |            |          |                     |         |          |          |         |           |
| Levoglucozan                  | 0.881**      | 0.916**  | 1            |                |          |            |          |                     |         |          |          |         |           |
| Arabitol                      | 0.547*       | 0.503    | 0.398        | 1              |          |            |          |                     |         |          |          |         |           |
| Mannitol                      | 0.569*       | 0.560*   | 0.477        | 0.864**        | 1        |            |          |                     |         |          |          |         |           |
| Erythritol                    | 0.459        | 0.411    | 0.477        | 0.719**        | 0.851**  | 1          |          |                     |         |          |          |         |           |
| Inositol                      | 0.2          | 0.516    | 0.433        | -0.086         | -0.064   | -0.051     | 1        |                     |         |          |          |         |           |
| Glycerol                      | 0.626*       | 0.473    | 0.38         | 0.688**        | 0.499    | 0.284      | -0.02    | 1                   |         |          |          |         |           |
| Glucose                       | 0.27         | 0.516    | 0.323        | 0.16           | 0.073    | -0.305     | 0.503    | 0.187               | 1       |          |          |         |           |
| Sucrose                       | -0.169       | 0.051    | 0.182        | -0.371         | -0.473   | -0.16      | 0.429    | -0.42               | -0.007  | 1        |          |         |           |
| Fructose                      | 0.407        | 0.662**  | 0.618*       | -0.134         | -0.13    | -0.108     | 0.754**  | -0.024              | 0.508   | 0.495    | 1        |         |           |
| Xylose                        | 0.727**      | 0.881**  | 0.921**      | 0.279          | 0.367    | 0.327      | 0.604*   | 0.244               | 0.525   | 0.292    | 0.771**  | 1       |           |
| Trehalose                     | 0.31         | 0.446    | 0.336        | 0.745**        | 0.877**  | 0.749**    | 0.09     | 0.275               | 0.156   | -0.275   | -0.103   | 0.332   | 1         |
| OC                            | 0.653*       | 0.855**  | 0.881**      | 0.429          | 0.385    | 0.433      | 0.411    | 0.288               | 0.341   | 0.411    | 0.622*   | 0.829** | 0.345     |
| Ca <sup>2+</sup>              | 0.543*       | 0.534*   | 0.653*       | 0.556*         | 0.415    | 0.547*     | 0.218    | 0.367               | 0.055   | 0.358    | 0.138    | 0.486   | 0.415     |
| Cl <sup>-</sup>               | 0.829**      | 0.811**  | 0.749**      | 0.798**        | 0.719**  | 0.547*     | 0.116    | 0.789**             | 0.292   | -0.244   | 0.191    | 0.582*  | 0.49      |
| SO <sub>4</sub> <sup>2-</sup> | 0.446        | 0.705**  | 0.560*       | 0.187          | 0.125    | 0.055      | 0.587*   | 0.178               | 0.508   | 0.42     | 0.829**  | 0.670** | 0.156     |
| Temperature                   | -0.196       | 0.033    | 0.046        | -0.644*        | -0.670** | -0.604*    | 0.411    | -0.464              | 0.31    | 0.679**  | 0.631*   | 0.235   | -0.604*   |
| RH                            | 0.407        | 0.244    | 0.181        | 0.608*         | 0.806**  | 0.670**    | -0.297   | 0.445               | -0.207  | -0.705** | -0.313   | 0.053   | 0.698**   |
| Wind speed                    | -0.613*      | -0.49    | -0.675**     | -0.407         | -0.495   | -0.662**   | -0.029   | -0.244              | 0.213   | -0.046   | -0.015   | -0.415  | -0.376    |
| PM <sub>2.5</sub>             | 0.152        | 0.187    | -0.007       | 0.117          | 0.361    | 0.442      | 0.337    | 0.18                | 0.09    | -0.233   | 0.037    | -0.004  | 0.429     |
| PM <sub>10</sub>              | 0.521        | 0.732**  | 0.609*       | 0.635*         | 0.53     | 0.336      | 0.288    | 0.389               | 0.640*  | 0.174    | 0.398    | 0.662** | 0.534*    |
| SO <sub>2</sub>               | 0.031        | 0.277    | 0.077        | 0.29           | 0.242    | 0.141      | 0.031    | -0.024              | 0.099   | -0.042   | 0.064    | -0.02   | -0.053    |
| NO <sub>2</sub>               | -0.126       | 0.042    | -0.051       | -0.267         | -0.294   | -0.373     | -0.289   | 0.139               | 0.104   | 0.241    | 0.435    | -0.038  | -0.448    |
| O <sub>3</sub>                | 0.468        | 0.53     | 0.464        | 0.459          | 0.899**  | 0.899**    | 0.815**  | -0.011              | 0.099   | -0.16    | -0.138   | 0.354   | 0.859**   |
| OTU                           | 0.552*       | 0.503    | 0.534*       | 0.679**        | 0.837**  | 0.785**    | 0.051    | 0.336               | -0.011  | -0.292   | -0.086   | 0.433   | 0.851**   |
| Shannon index                 | 0.415        | 0.424    | 0.257        | 0.402          | 0.516    | 0.095      | 0.125    | 0.292               | 0.604*  | -0.635*  | 0.015    | 0.279   | 0.525     |

Note: \* $p < 0.01$ ; \*\* $p < 0.05$ .

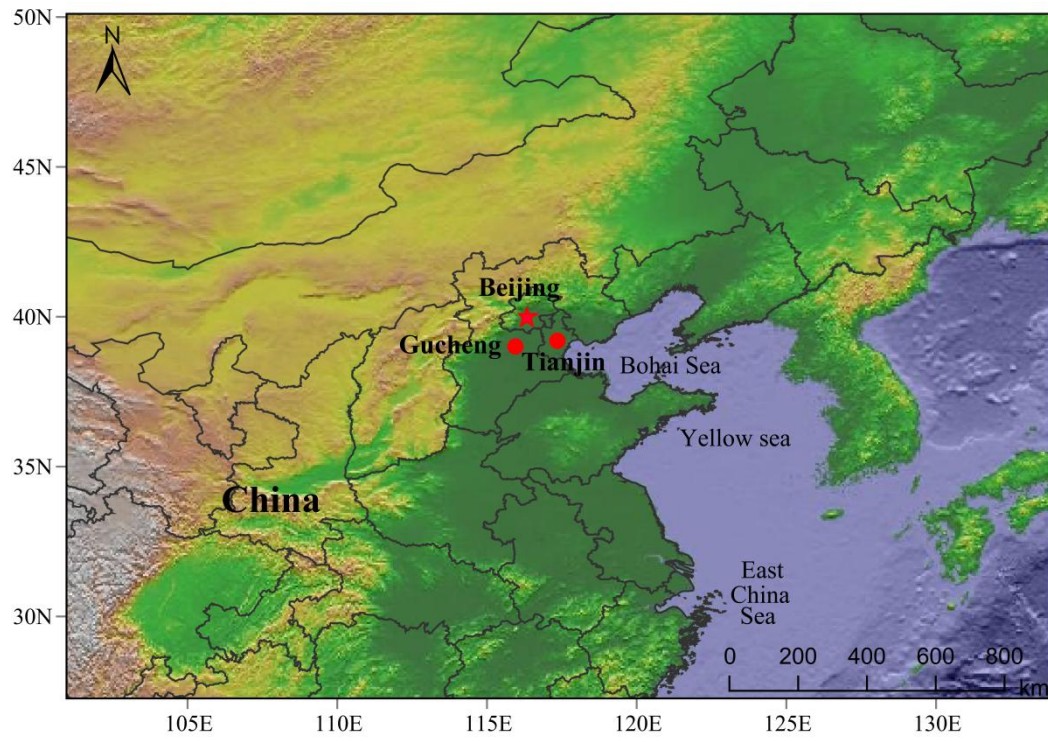

**Figure S1.** The geographical location of the observation site Gucheng (map from MeteInfo software).

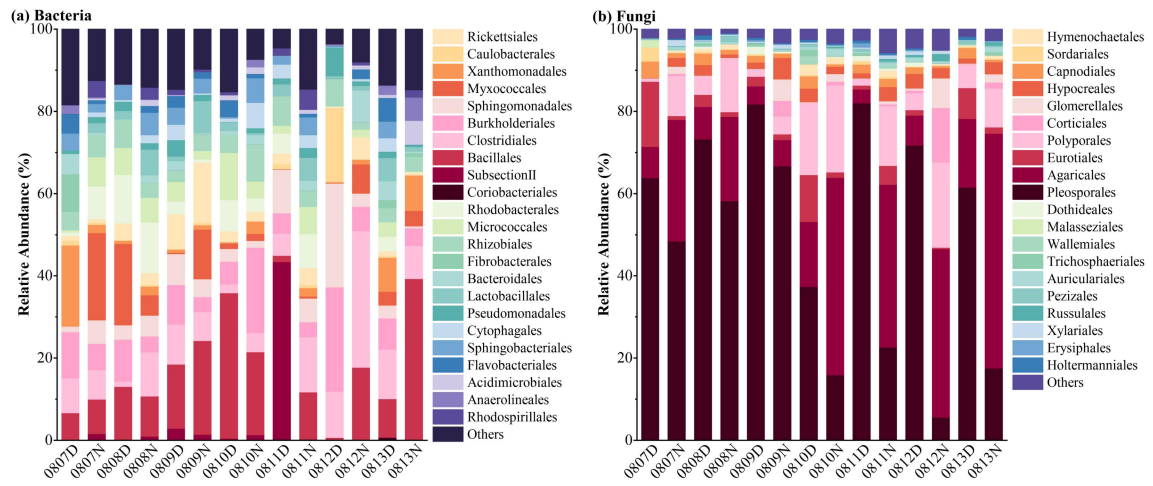

**Figure S2.** Relative abundances of airborne (a) bacteria and (b) fungi at the order level.



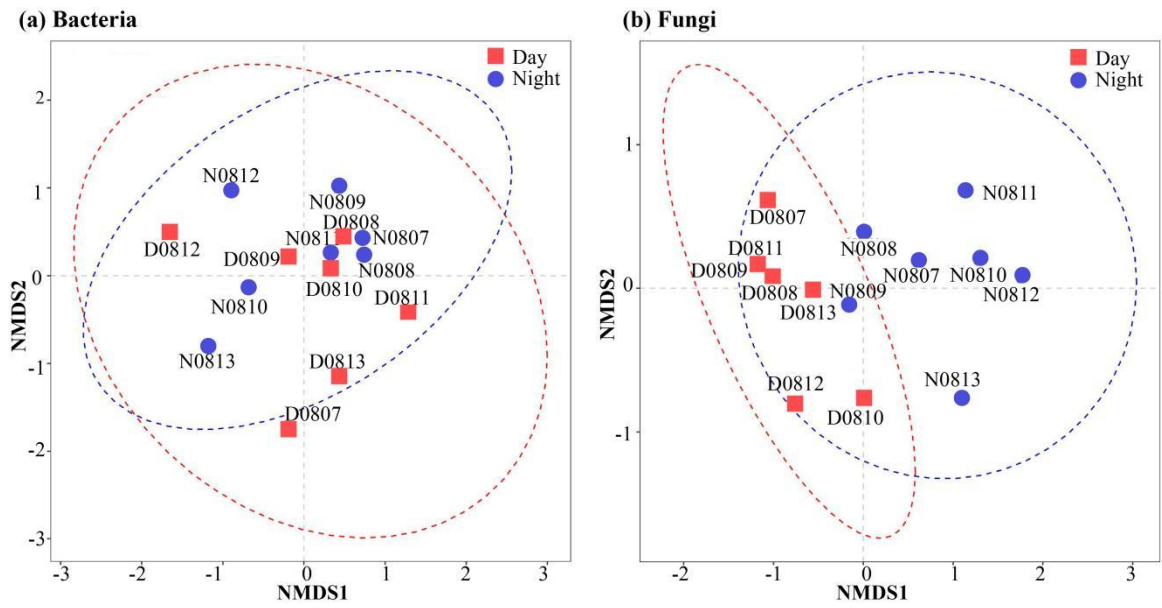

**Figure S3.** Comparison of the (a) bacterial and (b) fungal communities between in the daytime and nighttime samples, respectively.

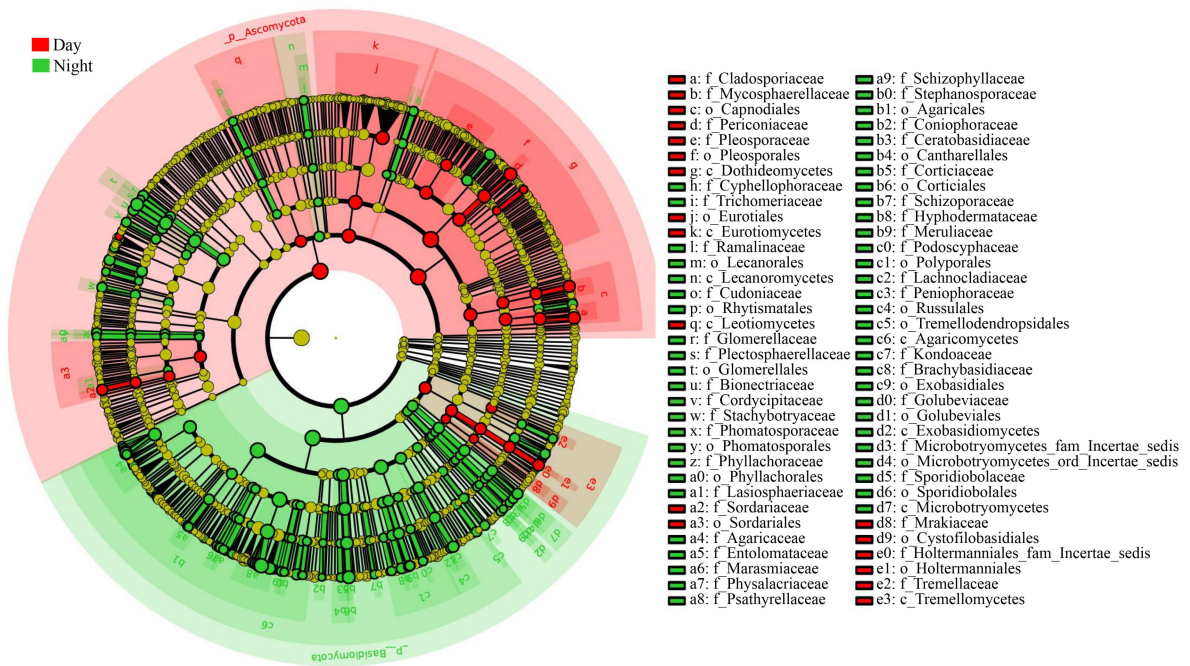

**Figure S4.** The cladogram of fungal taxa based on LefSe analysis of fungal abundance between daytime and nighttime samples.

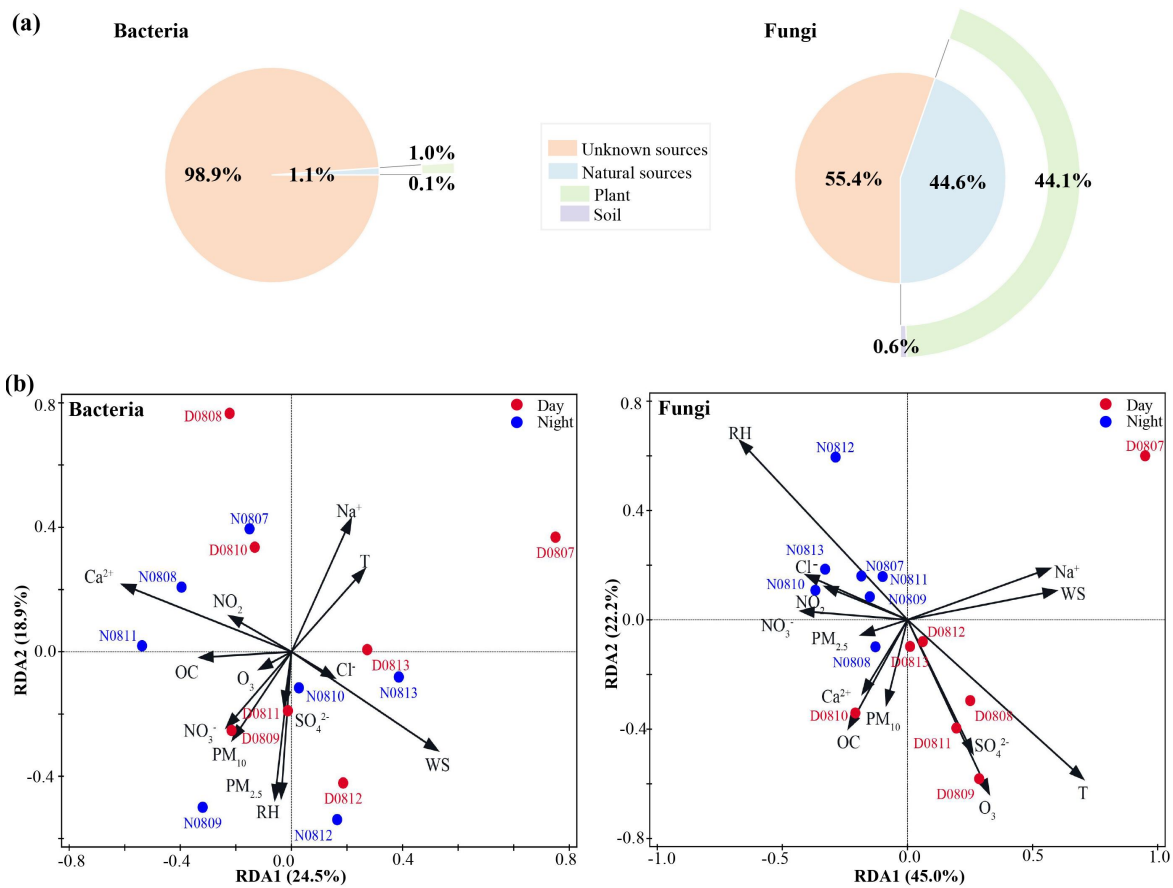

**Figure S5.** (a) Contribution of potential sources to airborne bacteria and fungi estimated by SourceTracker analysis. (b) The relationship between bacterial or fungal communities and environmental factors based on redundancy analysis (RDA). T, air temperature; RH, relative humidity; WS, wind speed.

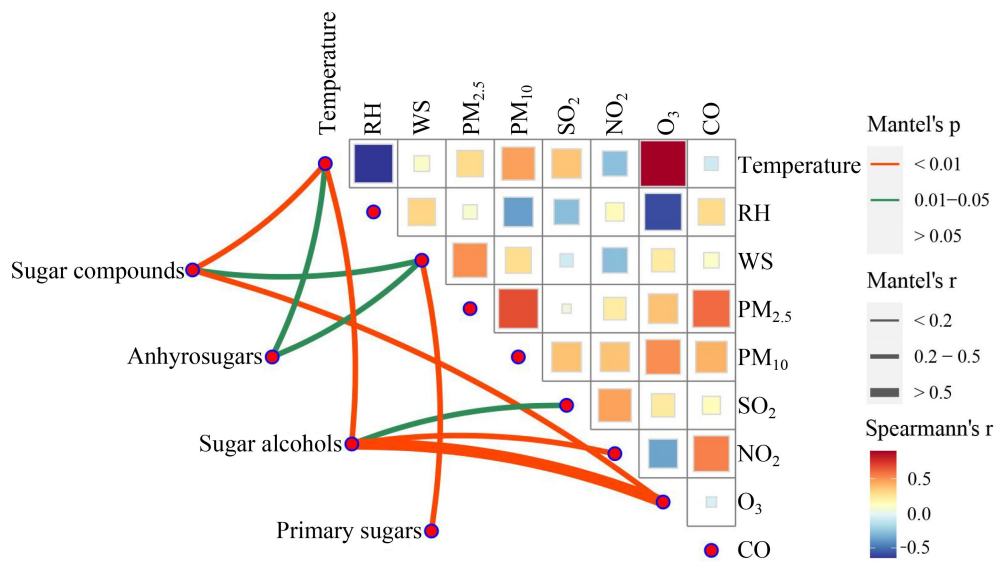

**Figure S6.** Correlations of sugar compounds with environmental factors based on Bray–Curtis distance. Edge width corresponds to Mantel's r value, and the edge color denotes statistical significance. Pairwise correlations of environmental factors with a heatmap are calculated by Spearman's correlation analysis.

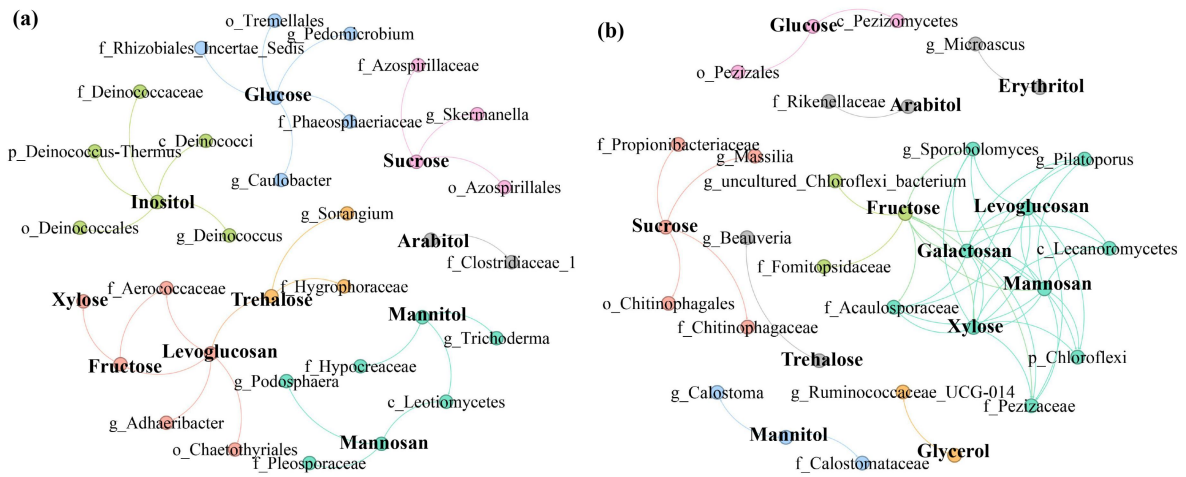

**Figure S7.** Co-occurrence networks between microbial taxa and sugar components (bold font) were constructed based on Spearman's correlation analysis in the (a) daytime and (b) nighttime samples. The nodes are colored according to different types of modularity classes.
